# Supplementary material
Source: Springer Nature journal article supplement (https://www.springermedizin.de/resource/supplementary/12874_2008_315_MOESM2_ESM.pdf/9434222)

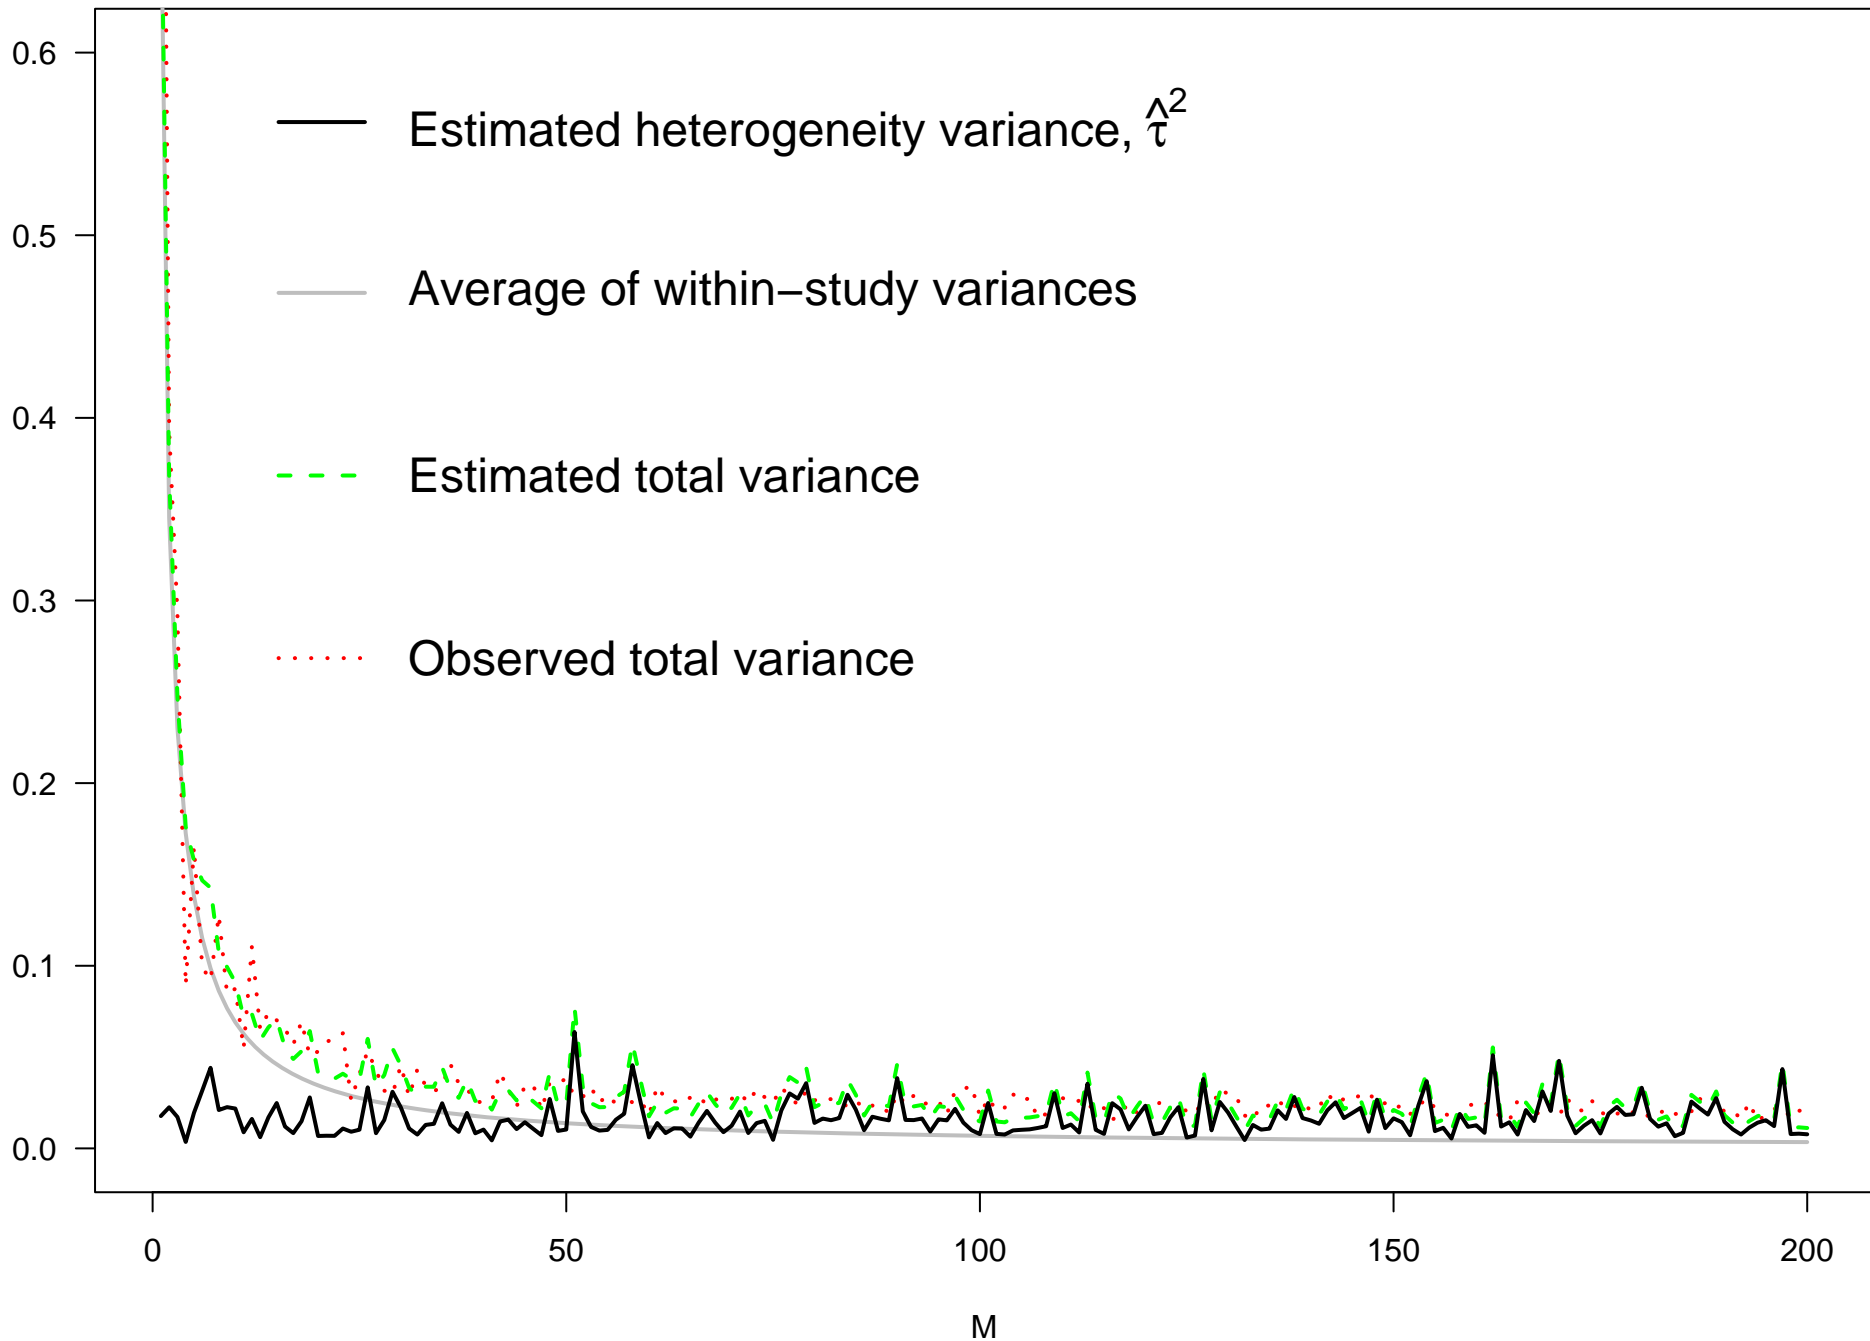

Supplement: MOESM2 [file 9434222]
